# Supplementary material
Source: HighWire-hosted journal article supplement (https://jmg.bmj.com/content/jmedgenet-2018-105703)
Supplement: inline-supplementary-material-11 [file inline-supplementary-material-11.xlsx]

## Sheet: Table S10
EntrezGene ID	Human gene	Stage 7
		Primary auditory cortex			Amygdala			Dorsolateral prefrontal cortex			Hippocampus			Posteroventral (inferior) parietal cortex			Inferolateral temporal cortex			Primary motor cortex			Mediodorsal nucleus of thalamus			Anterior (rostral) cingulate (medial prefrontal) cortex			Orbital frontal cortex			Primary somatosensory cortex			Posterior (caudal) superior temporal cortex			Striatum			Primary visual cortex			Ventrolateral prefrontal cortex
		logFC	Pvalue	adjPVal	logFC	Pvalue	adjPVal	logFC	Pvalue	adjPVal	logFC	Pvalue	adjPVal	logFC	Pvalue	adjPVal	logFC	Pvalue	adjPVal	logFC	Pvalue	adjPVal	logFC	Pvalue	adjPVal	logFC	Pvalue	adjPVal	logFC	Pvalue	adjPVal	logFC	Pvalue	adjPVal	logFC	Pvalue	adjPVal	logFC	Pvalue	adjPVal	logFC	Pvalue	adjPVal	logFC	Pvalue	adjPVal
56997	ADCK3	6.60991	6.22511e-13	5.83165e-11	5.87987	1.11739e-10	7.43002e-09	6.12402	2.06633e-11	1.3633e-09	6.05417	3.366e-11	1.96807e-09	6.15371	1.67736e-11	1.20514e-09	7.7467	8.68171e-17	1.01668e-14	5.59803	3.05923e-08	1.60595e-06	6.80044	9.94615e-08	6.5367e-06	6.41524	2.58993e-12	1.95177e-10	5.85872	7.30262e-09	4.79935e-07	6.37096	3.79345e-10	2.7966e-08	5.95465	6.69891e-11	4.1959e-09	6.86348	7.65616e-08	3.95786e-06	5.03622	2.56398e-08	1.15624e-06	5.90567	9.37038e-11	6.08752e-09
10939	AFG3L2	0.950235	0.710541	0.903279	1.31025	0.608867	0.845884	0.681309	0.790155	0.942875	-0.340506	0.894192	0.958753	0.795104	0.756143	0.899484	2.85758	0.264781	0.44509	1.85299	0.517518	0.759247	-3.25919	0.368306	0.80569	3.52218	0.169484	0.401764	1.05596	0.712215	0.920058	2.54614	0.373992	0.617288	0.537058	0.833846	0.932289	5.77737	0.111223	0.361214	-0.521493	0.838594	0.967951	1.0008	0.695889	0.872873
55129	ANO10	-0.924765	0.308749	0.60599	-1.48264	0.103118	0.324294	-1.40406	0.122626	0.348573	-3.02302	0.000956401	0.00746627	-1.38996	0.126412	0.314937	-2.20438	0.0156214	0.0540344	-1.77108	0.0816857	0.248531	-2.33128	0.0700808	0.365395	-1.40138	0.123337	0.329236	-1.4324	0.158792	0.449871	-1.69626	0.0953668	0.259182	-1.47165	0.105686	0.264386	-1.18176	0.357638	0.675479	-0.203384	0.822742	0.963326	-2.10021	0.0212054	0.0936349
54840	APTX	-0.627317	0.505451	0.779909	-1.25983	0.181527	0.451714	0.098219	0.916932	0.983077	-3.73058	8.97593e-05	0.00108789	-0.488368	0.604108	0.809104	-1.82695	0.0530268	0.137881	-1.45016	0.168994	0.394855	-1.38327	0.29934	0.748019	-0.009929	0.991587	0.99891	-1.19451	0.257016	0.581217	-1.19947	0.255048	0.489594	-0.542559	0.564609	0.771259	-2.07407	0.120039	0.38009	0.0609147	0.948424	0.995586	-1.02118	0.278601	0.526288
472	ATM	0.972359	0.0466913	0.191001	0.992984	0.0422523	0.184539	1.3097	0.00752116	0.0487495	1.03885	0.0336501	0.113276	1.08685	0.0263049	0.111173	1.12356	0.0216674	0.0697667	1.18856	0.0297479	0.129136	0.699265	0.310741	0.759171	1.21116	0.0133749	0.0707819	1.05426	0.0536964	0.239599	1.13399	0.0380525	0.139657	1.25733	0.0102577	0.0507825	0.995227	0.149421	0.42732	1.01638	0.0376559	0.180998	1.31386	0.00733511	0.0437475
1822	ATN1	67.3049	0.000184995	0.00295582	73.8993	4.19588e-05	0.000860283	77.607	1.73469e-05	0.000363128	100.114	3.92468e-08	1.30998e-06	81.0618	7.38172e-06	0.000175793	91.887	4.19104e-07	8.91635e-06	98.7587	1.10946e-06	4.17117e-05	90.2731	0.00038606	0.00849866	88.351	1.10394e-06	3.04364e-05	85.663	2.20237e-05	0.000646434	102.189	4.79623e-07	1.92078e-05	70.4782	9.18767e-05	0.0012738	101.94	6.3857e-05	0.00147515	65.659	0.000263219	0.00421529	72.9157	5.27264e-05	0.000888697
492	ATP2B3	3.73986	0.276273	0.570904	5.70773	0.0969792	0.31256	5.51487	0.108755	0.323635	5.40665	0.115844	0.271381	5.42211	0.11481	0.296033	9.72547	0.00484583	0.0216226	6.97367	0.0698332	0.225327	4.86878	0.316166	0.765515	8.94675	0.00949041	0.0549964	8.23958	0.032351	0.174136	7.79049	0.0429568	0.151524	4.80617	0.162008	0.354041	10.5286	0.0306404	0.163789	-2.00702	0.558791	0.836811	4.75393	0.166605	0.384669
51761	ATP8A2	5.54169	0.17844	0.443641	6.13748	0.13628	0.381693	8.52295	0.0388576	0.15992	7.7858	0.0590244	0.168601	7.60258	0.0652111	0.204649	8.62147	0.0366702	0.103994	9.20622	0.0459178	0.17298	0.477806	0.934531	1	10.1335	0.0141725	0.073579	9.49061	0.0396446	0.198948	9.8497	0.0327801	0.127073	7.88498	0.0558847	0.169787	12.9099	0.0270026	0.151458	6.43532	0.118329	0.372053	7.91281	0.0550293	0.183447
6310	ATXN1	-3.59909	0.0276427	0.134494	0.448506	0.782996	0.931224	-1.82713	0.262281	0.553758	0.874747	0.591215	0.771067	-1.95304	0.230876	0.460828	-4.27236	0.00904115	0.0352986	0.49189	0.787031	0.920158	-0.918274	0.69011	0.966659	-1.02675	0.528465	0.778239	-1.96807	0.280106	0.6077	-0.384933	0.832553	0.936623	-2.59707	0.111407	0.274849	1.7024	0.459935	0.762779	-2.905	0.0751061	0.282527	-2.12549	0.192354	0.421225
25814	ATXN10	-10.1899	0.255064	0.54442	-9.73406	0.276898	0.574814	-12.9223	0.149164	0.393348	-37.8352	2.97227e-05	0.00043182	-16.6647	0.0631182	0.200268	-27.5961	0.002185	0.0115059	-20.2751	0.0432462	0.165788	-16.3637	0.196349	0.623314	-11.4849	0.199686	0.446039	-17.2922	0.0844631	0.312903	-24.2527	0.015746	0.0770104	-17.5376	0.0505646	0.158362	-11.894	0.347393	0.665649	-7.94844	0.374479	0.693198	-16.7603	0.0616286	0.1986
6311	ATXN2	0.235048	0.760663	0.926441	0.0517043	0.946573	0.98869	0.80855	0.295071	0.593925	1.49654	0.0530877	0.156277	0.872757	0.258452	0.494841	1.46758	0.0578298	0.147181	1.34045	0.120877	0.319103	-1.26875	0.24541	0.69227	1.62827	0.0354305	0.143242	0.771356	0.371516	0.698152	1.65439	0.0557982	0.180976	0.925327	0.230922	0.44606	1.45226	0.183793	0.477756	0.650326	0.399562	0.717154	0.980594	0.204308	0.435699
4287	ATXN3	-0.30255	0.427736	0.721905	0.287289	0.451388	0.740422	0.216914	0.569544	0.833534	0.264582	0.48792	0.689595	-0.038491	0.919596	0.976902	-0.304975	0.424047	0.613598	0.228341	0.59231	0.812133	-0.588958	0.275186	0.723509	0.428724	0.261317	0.526923	-0.056553	0.894469	0.97888	-0.285208	0.503639	0.729002	0.0932457	0.806823	0.920037	0.52794	0.327918	0.648454	-0.033662	0.929655	0.991132	0.0837137	0.826236	0.941563
6314	ATXN7	1.12169	0.0116131	0.0729035	0.970268	0.0288457	0.143014	1.40013	0.00167803	0.0153466	1.35143	0.00241168	0.0154603	1.34872	0.00246013	0.0199875	1.42956	0.00134104	0.00782475	1.70056	0.000652359	0.00833565	1.26658	0.0435425	0.277759	1.56738	0.000446616	0.00505529	1.17235	0.0182456	0.120302	1.56744	0.00165503	0.015373	1.52541	0.000629672	0.00608014	1.43977	0.0218794	0.131696	1.00686	0.0233661	0.133594	1.40349	0.00163602	0.0138563
56652	ATXN80S	0.972115	0.531317	0.798123	0.950528	0.540469	0.806139	0.913542	0.556332	0.825972	1.08732	0.483843	0.686129	0.980105	0.527949	0.754353	0.669692	0.666239	0.814504	0.880925	0.611849	0.822916	1.15562	0.598716	0.937408	0.803956	0.604627	0.83323	0.876027	0.613829	0.869368	1.04583	0.546921	0.763916	0.914773	0.5558	0.764389	0.956323	0.663184	0.887214	0.961087	0.535983	0.821163	1.01438	0.513631	0.75199
146227	BEAN1	-1.0075	0.379231	0.67851	-0.082114	0.942835	0.987774	-0.979451	0.392627	0.694709	-0.332958	0.771247	0.891976	-0.260888	0.819789	0.931621	-0.308158	0.78786	0.894413	-0.614566	0.63127	0.835061	-0.744334	0.645839	0.952311	-0.752151	0.511425	0.765782	-0.695639	0.586973	0.854483	-0.0696378	0.956623	0.987144	-0.430067	0.70727	0.863886	1.01102	0.532548	0.81143	-1.06195	0.354042	0.675801	-1.09903	0.337509	0.590466
56652	C10orf2	1.63854	0.0278563	0.135338	1.19196	0.109029	0.334363	1.61597	0.030066	0.132622	1.32844	0.0742197	0.198691	1.65354	0.0264665	0.111605	2.02568	0.00665057	0.027885	1.52032	0.0676678	0.220904	1.1483	0.274482	0.722465	1.8341	0.0139102	0.0726176	1.60909	0.0531954	0.238178	1.52091	0.0675606	0.206209	1.8465	0.0132839	0.0611074	1.46276	0.164136	0.449029	1.12383	0.130711	0.393456	1.88937	0.0113088	0.0596799
773	CACNA1A	40.9466	1.84246e-16	2.5399e-14	44.3414	9.28304e-19	1.63962e-16	43.9698	1.67635e-18	2.58402e-16	47.1237	1.01866e-20	1.85724e-18	45.0135	3.16449e-19	5.47522e-17	46.4909	2.88014e-20	4.93289e-18	45.9432	1.47474e-16	2.66018e-14	42.98	4.24668e-10	4.61582e-08	46.1344	5.15547e-20	8.65507e-18	45.4628	2.83325e-16	5.0569e-14	46.4898	6.97946e-17	1.24572e-14	43.3496	4.46711e-18	6.82381e-16	48.1727	3.64958e-12	4.04459e-10	39.2027	2.52495e-15	3.17133e-13	43.3804	4.25609e-18	6.68206e-16
440193	CCDC88C	0.00118067	0.999385	1	-0.323518	0.832804	0.950836	0.0729157	0.96205	0.996003	-0.126508	0.934207	0.9772	-0.116629	0.939334	0.982474	-0.0529037	0.97246	0.990214	0.394949	0.817697	0.932594	0.189551	0.930303	1	0.162149	0.915733	0.980952	0.298281	0.861793	0.971774	0.412842	0.809593	0.925031	-0.001098	0.999428	1	-5.09324	0.0192505	0.12098	-1.007	0.511238	0.805965	0.0447593	0.976699	0.997117
5611	DNAJC3	-0.0331657	0.983543	0.998562	0.45416	0.7776	0.928063	1.33535	0.406484	0.708069	-0.756475	0.63806	0.807565	0.3186	0.84293	0.943352	0.209091	0.896533	0.956182	1.50268	0.403439	0.663242	-0.0585447	0.979459	1	1.39943	0.384361	0.656913	-0.184329	0.918329	0.985892	0.941648	0.600472	0.800584	0.163223	0.919141	0.971934	1.14501	0.614639	0.863487	0.487484	0.76176	0.938889	0.94935	0.554992	0.78316
1786	DNMT1	13.6976	2.82081e-07	1.06052e-05	14.772	3.37492e-08	1.50197e-06	15.0625	1.86063e-08	8.06876e-07	16.4324	9.97574e-10	4.55926e-08	15.4743	7.87922e-09	3.67033e-07	16.9379	3.22978e-10	1.44715e-08	16.3002	4.98433e-08	2.51531e-06	14.5337	0.000102234	0.00288433	16.4064	1.0564e-09	5.07429e-08	15.4927	2.07456e-07	1.01373e-05	16.7524	2.18839e-08	1.15596e-06	15.3351	1.05552e-08	4.51954e-07	17.0568	5.59966e-06	0.000176812	14.2254	1.00956e-07	3.94428e-06	15.0551	1.88934e-08	8.06944e-07
1938	EEF2	255.398	0.160055	0.417716	332.927	0.0673253	0.249196	249.648	0.169645	0.4255	388.804	0.0327909	0.110971	220.619	0.224738	0.454407	302.759	0.0960273	0.214876	317.518	0.118367	0.31483	408.496	0.112229	0.475317	245.737	0.176412	0.412305	198.575	0.328207	0.656241	328.091	0.106643	0.278593	112.662	0.534958	0.747672	333.05	0.19507	0.491765	126.597	0.485712	0.787129	195.43	0.282077	0.530191
6785	ELOVL4	-7.07397	0.237544	0.52377	-2.00889	0.737063	0.909677	-1.1558	0.846818	0.963693	-11.3059	0.0594628	0.169483	-9.10063	0.128884	0.319403	-14.2414	0.017765	0.0596601	-5.21632	0.435699	0.69281	-2.12873	0.801366	0.993926	-0.055353	0.992618	0.99891	-2.70097	0.686405	0.908037	-13.8373	0.0391935	0.142823	-10.477	0.0806016	0.219477	1.81863	0.82982	0.959711	-12.9901	0.0304869	0.158489	-5.11222	0.393098	0.647311
60481	ELOVL5	-3.72178	0.571995	0.826391	-6.4893	0.324692	0.627119	-0.330759	0.959936	0.995454	-10.6943	0.105006	0.253414	-10.3305	0.117324	0.300568	-10.1248	0.124776	0.260682	-4.05963	0.581398	0.80521	-4.68908	0.614628	0.942367	-2.36111	0.719924	0.895994	-11.8137	0.109211	0.363203	-4.47689	0.543199	0.761025	-0.147913	0.982077	0.995463	-5.86742	0.528739	0.808924	-5.04503	0.443744	0.752789	-2.94462	0.654766	0.847303
2259	FGF14	7.36271	0.00808152	0.0563215	8.78713	0.00160946	0.0169164	6.76074	0.0149305	0.0802667	10.7905	0.000113802	0.00132803	7.75076	0.00532493	0.0356272	9.96172	0.000359141	0.00266386	8.75612	0.00487078	0.0372358	10.3598	0.00840421	0.0940577	9.95421	0.000362773	0.00425982	9.04191	0.0036581	0.0387909	8.54111	0.00601249	0.0391054	7.17504	0.00982862	0.0491895	8.88579	0.0236063	0.139224	8.64721	0.00190488	0.021152	6.07962	0.028476	0.115099
2332	FMR1	-1.73169	0.523875	0.792942	2.06434	0.447419	0.737383	3.08814	0.255994	0.545786	3.11442	0.251977	0.457635	-0.941577	0.728862	0.885122	-5.49382	0.0437327	0.119275	1.44902	0.633291	0.835796	-0.0710827	0.985235	1	2.65985	0.32777	0.60272	-1.92546	0.526155	0.817184	-2.42367	0.425006	0.664242	0.104278	0.969374	0.992395	5.10274	0.184596	0.478769	-1.8575	0.49419	0.793062	2.02811	0.455424	0.704337
2395	FXN	-0.76355	0.00472695	0.0381223	-1.1272	3.44012e-05	0.000721023	-0.195615	0.466758	0.758789	-1.15541	2.20382e-05	0.000334539	-0.739851	0.00617445	0.0396718	-0.971609	0.000341041	0.00254392	-0.838098	0.00553526	0.0407519	-0.392747	0.301699	0.75064	-0.357023	0.18449	0.423649	-0.499924	0.0967498	0.339084	-0.693411	0.0214879	0.0957107	-0.627766	0.0199595	0.0818461	-0.826983	0.0300942	0.162078	-0.270419	0.314557	0.639446	-0.420922	0.117869	0.307894
57704	GBA2	11.5979	0.0165679	0.0939865	13.4266	0.00560565	0.0440041	10.2435	0.0341492	0.145669	13.4343	0.00557864	0.0295151	14.1744	0.0034735	0.0259	14.8741	0.00217883	0.0114877	15.2027	0.00503349	0.0382897	-9.43541	0.16687	0.580834	13.6571	0.00484754	0.0331164	14.0403	0.00952433	0.077445	15.9044	0.00335966	0.0259056	10.2945	0.0332724	0.118299	16.1696	0.0181524	0.116361	11.1855	0.0207985	0.124277	9.52589	0.0487489	0.169195
9570	GOSR2	-1.85416	0.199497	0.474629	-1.20043	0.405846	0.702771	-2.01684	0.162942	0.414532	-1.84298	0.202214	0.394971	-1.84034	0.202859	0.427237	-2.50652	0.0831584	0.193314	-2.12579	0.188319	0.423774	-1.3444	0.510293	0.892874	-1.53463	0.288103	0.559948	-1.67501	0.29969	0.626732	-3.31375	0.0406566	0.146209	-3.31351	0.022213	0.0885596	-2.45343	0.229906	0.540485	0.543763	0.706415	0.912954	-3.40053	0.0189618	0.0866387
2895	GRID2	16.9748	6.85486e-17	1.00199e-14	15.9085	3.50587e-15	4.371e-13	16.8483	1.10251e-16	1.41623e-14	16.6163	2.61971e-16	3.12815e-14	16.8184	1.23299e-16	1.64619e-14	16.458	4.70737e-16	5.14956e-14	16.8703	6.44702e-14	8.88746e-12	17.0575	1.18814e-09	1.19917e-07	16.5308	3.59708e-16	4.14912e-14	16.8565	6.73075e-14	9.35464e-12	16.7765	8.63647e-14	1.10105e-11	16.7482	1.60304e-16	2.12353e-14	16.2245	6.65303e-09	4.27306e-07	17.4411	1.16883e-17	1.86969e-15	17.0074	6.06505e-17	8.49908e-15
2911	GRM1	22.3699	2.52035e-17	3.88501e-15	22.5027	1.7078e-17	2.63249e-15	23.6182	6.1526e-19	1.00311e-16	22.2742	3.33466e-17	4.34943e-15	22.3778	2.46321e-17	3.76271e-15	21.5964	2.36869e-16	2.67757e-14	24.1937	2.09373e-16	3.69805e-14	16.5144	4.38652e-06	0.000191203	23.5992	6.51533e-19	1.02291e-16	24.0032	3.40958e-16	5.96008e-14	23.4851	1.26876e-15	2.02953e-13	21.5724	2.5375e-16	3.30969e-14	24.9134	1.05984e-11	1.12153e-09	24.0039	1.90864e-19	3.71987e-17	23.4709	9.59007e-19	1.60999e-16
3708	ITPR1	27.666	0.00170194	0.0176502	42.7778	1.55375e-06	4.79006e-05	34.4196	0.000100849	0.00157313	40.9171	4.18903e-06	8.0532e-05	31.2764	0.000399747	0.0050134	35.8938	5.09558e-05	0.000535652	35.8083	0.000290416	0.00449296	40.7531	0.00108938	0.0200125	37.1784	2.75843e-05	0.00050619	36.204	0.000249305	0.00500071	35.0256	0.000391175	0.00513769	31.0676	0.000436369	0.00456237	40.999	0.00101706	0.0141587	25.3893	0.00394029	0.0367097	33.6211	0.00014455	0.00199592
3748	KCNC3	16.0356	0.000164022	0.00270016	21.017	9.41553e-07	3.05842e-05	19.2407	6.74028e-06	0.000159176	22.8185	1.11223e-07	3.29702e-06	18.5237	1.43377e-05	0.000313286	22.7169	1.25929e-07	3.0591e-06	18.5617	9.65692e-05	0.00188861	22.7123	0.000160364	0.00415135	23.1369	7.51698e-08	2.68899e-06	21.1	9.96069e-06	0.000317469	21.7515	5.35437e-06	0.000155045	17.6368	3.5313e-05	0.000583595	25.1776	2.98978e-05	0.000787186	8.44328	0.045554	0.205375	17.9609	2.55082e-05	0.000491496
3752	KCND3	22.9035	2.21475e-11	1.69159e-09	20.802	9.88272e-10	5.60439e-08	24.6476	7.78094e-13	6.40454e-11	21.227	4.68531e-10	2.31616e-08	24.2751	1.61373e-12	1.38895e-10	22.6366	3.6406e-11	1.96593e-09	27.5879	7.36601e-13	8.49647e-11	12.7117	0.00692051	0.0813281	26.7284	1.15283e-14	1.117e-12	24.4604	1.46135e-10	1.30414e-08	26.5422	4.54057e-12	4.7233e-10	23.8721	3.52301e-12	2.76556e-10	26.2253	4.29987e-08	2.35189e-06	21.9653	1.24753e-10	8.36089e-09	25.1245	3.02358e-13	2.84822e-11
3766	KCNJ10	-8.03099	0.573231	0.826927	-13.0451	0.360379	0.661105	0.076504	0.995718	0.999646	-10.0016	0.483034	0.685383	-10.3909	0.466179	0.703313	-7.34525	0.606399	0.769906	-1.4817	0.925922	0.980754	-9.98921	0.620274	0.945212	-0.013804	0.999227	1	-10.3602	0.515755	0.810317	-0.532765	0.973331	0.992691	1.39204	0.922201	0.973171	-6.42553	0.749925	0.9266	-4.57485	0.74826	0.932493	-2.73633	0.847767	0.950422
9711	KIAA0226	0.666274	0.765722	0.928593	-0.428125	0.848152	0.957411	1.84384	0.409796	0.710597	1.29845	0.561513	0.746453	2.12067	0.343205	0.589424	3.29768	0.140874	0.283554	2.65224	0.289093	0.548	1.22555	0.698351	0.969883	2.00664	0.369747	0.642204	0.707325	0.777223	0.943401	2.52872	0.312103	0.556352	2.31712	0.300425	0.527997	2.41811	0.444618	0.749473	1.44433	0.518418	0.810582	1.79902	0.421261	0.674324
10749	KIF1C	-6.09791	0.577214	0.829325	-12.1121	0.268503	0.564366	0.163176	0.988095	0.999078	1.70966	0.875775	0.950661	0.977666	0.928767	0.980715	2.52108	0.817691	0.912276	-1.46457	0.904658	0.97328	-9.5106	0.538716	0.909616	0.621259	0.954699	0.992168	-8.17073	0.504117	0.802846	3.75498	0.758782	0.898775	5.93908	0.587168	0.787033	-3.04702	0.843823	0.964922	-3.30285	0.762661	0.939092	3.57402	0.743835	0.90147
92935	MARS2	0.324193	0.548491	0.81039	0.90501	0.0945249	0.308283	-0.00764167	0.988713	0.999209	0.0458883	0.932299	0.976167	0.165903	0.758754	0.900293	-0.00975967	0.985584	0.995447	0.0368668	0.951322	0.988699	-0.0157547	0.983546	1	0.506253	0.348952	0.62351	0.145656	0.809418	0.955941	0.455587	0.450805	0.686393	0.309172	0.567163	0.773402	0.851441	0.265459	0.583956	-0.05426	0.919986	0.989643	-0.192496	0.721588	0.88864
4361	MRE11A	0.325697	0.404274	0.702224	0.519361	0.183889	0.455452	0.650857	0.0960937	0.298418	0.35595	0.36209	0.573576	0.459056	0.240031	0.472139	0.295187	0.449676	0.638051	0.602623	0.167897	0.393353	0.318105	0.564518	0.923548	0.662672	0.0902321	0.267326	0.156039	0.720691	0.922893	0.636061	0.145593	0.341874	0.425631	0.275927	0.500226	0.398054	0.471005	0.770784	0.659727	0.0916651	0.318539	0.526747	0.177747	0.401637
4547	MTPAP	-	-	-	-	-	-	-	-	-	-	-	-	-	-	-	-	-	-	-	-	-	-	-	-	-	-	-	-	-	-	-	-	-	-	-	-	-	-	-	-	-	-	-	-	-
10528	NOP56	3.93334	0.122344	0.355826	3.21341	0.206603	0.487797	5.04331	0.0478426	0.185673	1.48143	0.560037	0.745597	5.18127	0.0420963	0.15291	6.50467	0.0108568	0.0406376	1.39056	0.624615	0.830011	2.01898	0.574366	0.928885	5.24633	0.0395967	0.154239	3.14977	0.268053	0.592736	3.22831	0.256323	0.491042	4.1006	0.107297	0.267334	-1.87318	0.602302	0.855975	4.56937	0.072855	0.277291	3.99059	0.117017	0.30657
5111	PCNA	7.11545	0.322982	0.622466	7.60138	0.291089	0.591456	10.5972	0.141378	0.379967	4.3468	0.545809	0.735905	4.72679	0.511294	0.740919	6.34586	0.378004	0.568391	3.28291	0.683197	0.865648	8.9901	0.377171	0.81097	9.65484	0.180161	0.417095	5.00648	0.533768	0.821832	1.08944	0.892259	0.96272	5.22427	0.4679	0.691212	2.25795	0.824373	0.958109	5.15391	0.47391	0.77773	5.40004	0.453071	0.701904
5173	PDYN	-4.1494	0.870303	0.9686	-27.8095	0.274251	0.57184	-3.98308	0.875458	0.970351	-41.399	0.103981	0.251764	-4.48629	0.859878	0.949472	-7.92754	0.755099	0.874613	-2.24721	0.93696	0.983915	0.241099	0.994648	1	-3.61955	0.886744	0.969625	-4.44419	0.875709	0.974312	-4.46561	0.875114	0.955172	-6.18036	0.807863	0.920528	-178.215	1.1049e-06	4.16325e-05	-7.59389	0.765096	0.939933	-3.88105	0.878623	0.962384
23533	PIK3R5	-	-	-	-	-	-	-	-	-	-	-	-	-	-	-	-	-	-	-	-	-	-	-	-	-	-	-	-	-	-	-	-	-	-	-	-	-	-	-	-	-	-	-	-	-
11284	PNKP	-0.0656537	0.968732	0.994774	-0.537129	0.74846	0.914643	-0.259875	0.876698	0.970572	-0.039286	0.981287	0.994892	-0.0301547	0.985636	0.997144	1.55914	0.35222	0.541798	-2.51727	0.179438	0.409937	-0.00627267	0.997887	1	0.218303	0.8963	0.973211	-0.645149	0.730476	0.926551	-1.34446	0.472943	0.705242	-1.80055	0.282774	0.508399	-2.03456	0.390625	0.704322	0.436987	0.794176	0.950799	-1.25195	0.454959	0.703858
5428	POLG	1.69555	0.246156	0.53401	1.4313	0.327445	0.629924	1.89533	0.194953	0.464273	1.69018	0.247651	0.452692	2.3514	0.108085	0.285621	3.68486	0.0120334	0.0439643	1.90959	0.242716	0.494927	1.724	0.404158	0.829949	2.86522	0.0504436	0.181594	1.75362	0.283281	0.61041	2.16067	0.186348	0.401081	2.30714	0.114859	0.280465	3.30113	0.110671	0.360341	1.07117	0.463494	0.768832	1.48964	0.308144	0.55935
11128	POLR3A	0.713506	0.642682	0.869355	2.25689	0.142803	0.391933	0.941406	0.540491	0.814437	2.75178	0.0741966	0.198686	1.35493	0.378498	0.623816	2.65392	0.0850361	0.196521	1.99471	0.246397	0.499332	3.00036	0.168257	0.582888	2.50546	0.1039	0.293747	1.61279	0.348485	0.677706	1.76905	0.303842	0.54651	1.45513	0.344296	0.576012	4.43937	0.0418244	0.200388	0.706003	0.64618	0.883163	1.4283	0.353253	0.607419
5521	PPP2R2B	-20.0343	0.00020603	0.00321976	-23.0402	2.09382e-05	0.000477427	-21.0304	9.93953e-05	0.00155331	-22.828	2.48144e-05	0.000370707	-20.0236	0.00020762	0.00295088	-26.151	1.50228e-06	2.67289e-05	-17.8817	0.00294078	0.0259302	-13.1113	0.0833927	0.405143	-19.5173	0.000297368	0.00363269	-20.6312	0.000617516	0.0101755	-19.4469	0.00123634	0.0124191	-23.5666	1.36633e-05	0.000266293	-20.6037	0.00668936	0.0578403	-23.8655	1.06845e-05	0.000278289	-23.9912	9.62812e-06	0.000215375
144165	PRICKLE1	-8.91017	0.00129679	0.014334	-4.55632	0.098087	0.314739	-7.5409	0.00636732	0.0431684	-6.97342	0.0115722	0.0513461	-8.18667	0.00308647	0.0237451	-7.31433	0.00811793	0.0324335	-6.89397	0.0254227	0.115946	-9.94552	0.0108924	0.113726	-4.52229	0.100612	0.287202	-6.49356	0.0352057	0.183281	-6.47243	0.0358014	0.134571	-8.33485	0.00259668	0.0184069	1.13193	0.770929	0.937926	-9.67817	0.000484457	0.0070209	-8.47539	0.0021991	0.0174896
5582	PRKCG	-7.69279	0.676194	0.887633	-61.8551	0.000864725	0.0102533	-25.0546	0.174274	0.432584	-72.8757	9.13664e-05	0.00110194	-9.77063	0.595813	0.80308	1.97416	0.914634	0.965404	-14.7812	0.473	0.723582	-9.00457	0.729564	0.978258	-11.2327	0.542017	0.787185	-6.04977	0.76891	0.94083	-0.848721	0.967121	0.990446	-20.7983	0.259202	0.480279	-4.23759	0.870753	0.975971	18.6919	0.310493	0.634932	-26.1721	0.155893	0.368202
26278	SACS	-4.82283	0.05756	0.218537	-2.53177	0.317875	0.619955	-2.55628	0.31322	0.613904	-3.46249	0.172207	0.355137	-4.25108	0.0939548	0.260353	-5.26603	0.0382196	0.107489	-2.4988	0.377835	0.640208	-4.5475	0.204786	0.636435	-1.81526	0.473735	0.737444	-2.53862	0.370289	0.697317	-3.34272	0.238317	0.470147	-3.7926	0.134944	0.312481	-1.90068	0.595758	0.851938	-4.88	0.054678	0.23207	-2.94866	0.24483	0.487589
950	SCARB2	-8.42166	0.452703	0.741122	-13.2937	0.236177	0.525817	1.46649	0.895924	0.975635	-21.4104	0.0568146	0.16417	-15.4767	0.168014	0.379566	-12.3355	0.271607	0.453394	-5.98148	0.633255	0.835796	-8.28571	0.601309	0.938228	3.08783	0.78299	0.927332	-16.2611	0.195053	0.503934	-6.69358	0.593388	0.796381	0.88616	0.936995	0.979609	2.2319	0.888047	0.98094	-7.60042	0.497935	0.795568	-2.52789	0.821603	0.939386
23064	SETX	2.81081	0.0636223	0.234338	3.08868	0.0416392	0.183195	4.0486	0.00771282	0.0494769	2.14419	0.15665	0.33277	2.46261	0.103949	0.278578	3.28959	0.0301032	0.0894079	3.81154	0.0246416	0.113651	3.06164	0.152697	0.558798	4.71764	0.00194229	0.0162653	3.45821	0.0413487	0.204107	4.05459	0.0168903	0.080993	4.06514	0.00746934	0.0404834	5.43087	0.011453	0.0840313	2.62262	0.0834162	0.300824	4.07004	0.00739868	0.0439565
64374	SIL1	-1.19382	0.127424	0.364906	-1.81862	0.0205101	0.112839	-1.61072	0.0399973	0.163106	-3.66698	3.90131e-06	7.55144e-05	-1.69877	0.0303655	0.123029	-0.400568	0.608478	0.771392	-2.6203	0.00290099	0.0257131	-4.09788	0.000243114	0.00580597	-1.44001	0.0661723	0.217995	-1.74061	0.0470905	0.221182	-1.88076	0.0320078	0.124879	-1.95224	0.0129327	0.060161	-4.61421	3.77324e-05	0.000956338	-0.836305	0.285172	0.607587	-1.75649	0.0252002	0.105505
6548	SLC9A1	0.729003	0.723584	0.909294	-0.931874	0.65122	0.869045	1.18925	0.564026	0.830824	2.17074	0.292635	0.500277	1.97171	0.339068	0.585343	3.46445	0.0934598	0.2109	2.0583	0.372013	0.634657	-4.56294	0.118139	0.48965	3.19404	0.121869	0.326859	2.55494	0.267967	0.592624	3.04341	0.187155	0.402154	1.09445	0.595484	0.792414	1.94843	0.503974	0.792738	-1.57365	0.445351	0.754323	0.993708	0.629767	0.832554
6687	SPG7	0.231466	0.920227	0.982995	-1.1105	0.630945	0.857145	-1.0925	0.636489	0.871657	-0.323155	0.888805	0.956542	0.0433133	0.985048	0.997144	3.26339	0.158572	0.30916	-0.381734	0.88256	0.963318	-0.0630367	0.984613	1	0.740437	0.748711	0.91083	-1.63845	0.526162	0.817184	0.297483	0.908348	0.969151	-0.969726	0.67484	0.844401	0.0175723	0.99571	1	-1.4269	0.537102	0.822397	-1.19276	0.605876	0.817675
6712	SPTBN2	33.2028	0.00532947	0.0415478	42.5579	0.000372933	0.00521307	40.3136	0.00074063	0.00805008	48.1927	5.83872e-05	0.000760379	42.4851	0.000381507	0.00482748	52.557	1.22268e-05	0.000160836	47.9723	0.000334205	0.00501485	49.926	0.00307174	0.044823	47.6615	7.0098e-05	0.00110186	43.9399	0.000999421	0.0146847	51.4023	0.000123844	0.00208946	38.0435	0.00143766	0.0116413	57.2094	0.000710325	0.0107251	35.6862	0.00276989	0.0281067	41.0106	0.000600447	0.0062808
10273	STUB1	11.2146	0.698703	0.897164	18.4371	0.524621	0.797136	-19.0272	0.511446	0.79374	2.37884	0.934556	0.977316	-12.8072	0.658471	0.842979	5.9057	0.838469	0.924709	-34.9333	0.281201	0.538519	25.5333	0.533252	0.907291	-17.885	0.537105	0.783846	-12.0211	0.710557	0.919552	-24.6074	0.447602	0.683803	-46.0404	0.11267	0.277155	-4.91965	0.90442	0.985879	-8.68295	0.764402	0.93948	-29.3903	0.310703	0.56255
23345	SYNE1	9.78719	6.34934e-08	2.71867e-06	10.2081	1.79274e-08	8.32812e-07	10.7064	3.80513e-09	1.82776e-07	9.45636	1.66629e-07	4.66231e-06	10.7661	3.14885e-09	1.5596e-07	11.378	4.31816e-10	1.8774e-08	10.6903	1.22907e-07	5.72532e-06	10.0395	7.40101e-05	0.00220161	11.2873	5.8254e-10	2.97517e-08	10.3471	2.96164e-07	1.3834e-05	10.8637	7.81429e-08	3.68053e-06	11.0777	1.15646e-09	6.05216e-08	11.7399	3.93211e-06	0.000129462	10.1824	1.93908e-08	8.93452e-07	10.8582	2.34714e-09	1.16029e-07
255928	SYT14	-0.0845217	0.879695	0.970848	0.359685	0.519633	0.793702	0.275869	0.621358	0.862878	-0.152492	0.784805	0.899193	0.182518	0.743803	0.893417	-0.136558	0.806819	0.905749	0.405996	0.515639	0.757509	0.311861	0.692953	0.967532	0.330286	0.554312	0.796465	0.202904	0.745207	0.933283	0.149569	0.810675	0.925457	0.215741	0.699276	0.859288	0.224106	0.776595	0.940366	0.376234	0.500617	0.797489	0.395605	0.478839	0.725187
6908	TBP	0.755235	0.426369	0.721024	1.88743	0.0473666	0.199243	1.75728	0.06475	0.229063	1.43195	0.131987	0.297167	1.09623	0.248515	0.482807	0.811246	0.392911	0.583738	0.750221	0.479696	0.729809	1.28127	0.340081	0.785498	1.60971	0.0905378	0.267914	1.36535	0.198718	0.509136	0.609247	0.565934	0.776939	1.61948	0.0886059	0.233983	2.09844	0.118596	0.376858	1.02281	0.281565	0.603492	1.00517	0.289933	0.538634
55775	TDP1	0.253759	0.538682	0.803618	0.32445	0.431904	0.724077	0.282801	0.493265	0.780788	0.542896	0.18884	0.377368	0.50893	0.217949	0.446376	0.425126	0.303256	0.490131	0.125967	0.784827	0.918902	0.478245	0.412705	0.835463	0.530874	0.198795	0.444767	0.383056	0.406595	0.725327	0.0951642	0.836577	0.938887	0.632952	0.125698	0.298005	-0.331154	0.570476	0.837894	0.5103	0.216716	0.525774	0.39482	0.338975	0.591993
51567	TDP2	-0.310716	0.910356	0.980509	0.368298	0.893834	0.972727	2.61811	0.343096	0.645726	-5.06606	0.0670727	0.18502	-2.57189	0.351672	0.598209	-9.46417	0.000673441	0.00447974	-0.0963553	0.975087	0.995978	-2.78458	0.475712	0.875201	0.135559	0.960823	0.9922	0.417966	0.892246	0.978503	-3.69418	0.231683	0.461267	-2.22161	0.42103	0.649454	-2.17438	0.577523	0.841495	-2.87141	0.298501	0.621646	0.120976	0.965034	0.993056
343641	TGM6	-	-	-	-	-	-	-	-	-	-	-	-	-	-	-	-	-	-	-	-	-	-	-	-	-	-	-	-	-	-	-	-	-	-	-	-	-	-	-	-	-	-	-	-	-
339453	TMEM240	2.49852	0.666101	0.881913	3.05231	0.598116	0.839644	3.27304	0.571929	0.834491	5.76399	0.319796	0.52964	4.25653	0.462382	0.699951	7.42345	0.200303	0.365827	1.35927	0.833674	0.940205	5.9254	0.469413	0.872729	4.45623	0.441667	0.710927	2.50344	0.698962	0.913894	4.44201	0.4927	0.720947	1.31269	0.820633	0.926224	1.64126	0.841126	0.964017	-1.13568	0.844486	0.969621	0.218564	0.969885	0.994941
1200	TPP1	-2.32823	0.724997	0.910117	-15.2871	0.0213908	0.116363	-1.96013	0.767095	0.932995	-4.38431	0.507778	0.706811	-2.78509	0.673901	0.852498	-4.32739	0.5133	0.695771	-1.19642	0.87154	0.958853	-23.4809	0.0125106	0.124271	0.689568	0.917011	0.98138	-7.1267	0.335765	0.664399	1.62941	0.825701	0.933232	1.11173	0.866591	0.947995	-16.5471	0.0777295	0.293276	-3.122	0.637149	0.88027	-1.12142	0.865439	0.957386
7222	TRPC3	3.82552	0.00126791	0.0140975	3.96003	0.000854033	0.0101478	3.83715	0.00122587	0.0120219	3.59302	0.00244578	0.0156201	3.90717	0.000998817	0.0100916	3.75419	0.00155653	0.00881515	3.83615	0.00378932	0.0311901	-0.28361	0.864801	1	3.93166	0.000929121	0.00916473	3.99942	0.00255456	0.0299299	3.52756	0.00770294	0.0463982	3.76496	0.00150936	0.0120891	2.52473	0.130228	0.396507	0.451925	0.701227	0.911265	3.75855	0.00153729	0.0132162
146057	TTBK2	0.934528	0.588096	0.836149	2.69581	0.118793	0.351588	2.04298	0.236799	0.522225	2.58798	0.134215	0.30043	1.91801	0.266657	0.504963	1.94423	0.260187	0.438934	2.60513	0.17738	0.407209	0.483803	0.842811	0.999232	2.94516	0.0884651	0.263994	2.26164	0.241437	0.561257	2.83155	0.142718	0.337403	2.13626	0.216117	0.429197	3.61933	0.138577	0.410295	0.162967	0.924739	0.990337	1.98323	0.250766	0.494266
54902	TTC19	-0.107477	0.959907	0.993049	0.14054	0.947589	0.988819	1.05497	0.621762	0.863227	-4.3666	0.0417349	0.131927	0.643537	0.763427	0.90225	-1.83389	0.391274	0.582071	0.173454	0.942152	0.985876	-1.55056	0.60814	0.939556	1.51917	0.477516	0.740852	-1.25622	0.599279	0.860657	-1.66353	0.48662	0.715622	0.239054	0.910972	0.968611	0.982963	0.745122	0.924707	-1.36506	0.523284	0.812776	0.335346	0.875363	0.961523
7345	UCHL1	-293.04	0.0158207	0.090965	-349.132	0.00410769	0.0348076	-315.496	0.0094268	0.057476	-563.993	4.39546e-06	8.41189e-05	-311.768	0.0102941	0.057004	-339.256	0.00527845	0.0231929	-546.449	6.48365e-05	0.00135557	-650.48	0.000167143	0.00428107	-327.759	0.00701722	0.0436799	-294.257	0.0300799	0.166027	-492.561	0.000308045	0.00426385	-385.114	0.00157009	0.0124695	-370.984	0.0306223	0.163744	-189.719	0.117316	0.369742	-411.327	0.000743225	0.00742612
6843	VAMP1	-11.1876	0.256583	0.546148	-2.16019	0.826448	0.948015	-3.13833	0.750084	0.92664	-1.1507	0.907019	0.963613	-8.08123	0.412292	0.656997	-2.53961	0.796587	0.899688	-12.2111	0.268031	0.523225	-25.83	0.0644234	0.348219	-0.160747	0.986982	0.997482	-1.9874	0.856817	0.96971	-9.72186	0.377714	0.620093	-4.97206	0.613849	0.806105	0.803453	0.954014	0.996656	-46.5223	3.36759e-06	9.92701e-05	-6.2273	0.527448	0.761486
51741	WWOX	7.98667	3.60372e-10	2.29717e-08	5.98624	1.94634e-06	5.83076e-05	7.7182	1.27304e-09	6.4822e-08	7.17881	1.45602e-08	5.2979e-07	7.52075	3.15489e-09	1.5596e-07	8.43987	3.98525e-11	2.13167e-09	8.30832	4.73374e-09	2.81739e-07	3.93208	0.025121	0.19895	8.1145	1.95399e-10	1.079e-08	6.89508	9.6906e-07	4.06717e-05	8.21004	7.02463e-09	4.05455e-07	8.3361	6.64961e-11	4.19148e-09	7.80769	1.08376e-05	0.000315799	7.82535	7.72266e-10	4.51536e-08	8.2753	8.95673e-11	5.90935e-09
