# Supplementary material
Source: HighWire-hosted journal article supplement (https://jmg.bmj.com/content/jmedgenet-2018-105703)
Supplement: inline-supplementary-material-13 [file inline-supplementary-material-13.xlsx]

## Sheet: Table S12
EntrezGene ID	Human gene	Stage 9
		Primary auditory cortex			Amygdala			Dorsolateral prefrontal cortex			Hippocampus			Posteroventral (inferior) parietal cortex			Inferolateral temporal cortex			Primary motor cortex			Mediodorsal nucleus of thalamus			Anterior (rostral) cingulate (medial prefrontal) cortex			Orbital frontal cortex			Primary somatosensory cortex			Posterior (caudal) superior temporal cortex			Striatum			Primary visual cortex			Ventrolateral prefrontal cortex
		logFC	Pvalue	adjPVal	logFC	Pvalue	adjPVal	logFC	Pvalue	adjPVal	logFC	Pvalue	adjPVal	logFC	Pvalue	adjPVal	logFC	Pvalue	adjPVal	logFC	Pvalue	adjPVal	logFC	Pvalue	adjPVal	logFC	Pvalue	adjPVal	logFC	Pvalue	adjPVal	logFC	Pvalue	adjPVal	logFC	Pvalue	adjPVal	logFC	Pvalue	adjPVal	logFC	Pvalue	adjPVal	logFC	Pvalue	adjPVal
56997	ADCK3	5.85433	1.01017e-18	6.77015e-17	6.00537	1.61468e-19	1.06531e-17	6.14294	9.77506e-19	6.79287e-17	6.38271	1.48255e-21	1.15844e-19	6.22013	1.13957e-20	8.32869e-19	6.5009	3.31008e-22	2.51684e-20	6.021	1.3336e-19	9.50105e-18	7.10525	1.26429e-25	9.87895e-24	5.94322	9.50237e-18	6.23874e-16	6.02936	1.20373e-19	8.36493e-18	5.75794	3.21083e-18	2.13501e-16	5.64484	1.22945e-17	7.46402e-16	6.31961	3.28244e-21	1.81886e-19	5.71854	1.16407e-16	7.20367e-15	5.81636	1.59512e-18	1.00546e-16
10939	AFG3L2	-0.601622	0.739656	0.890866	1.41432	0.43485	0.636044	-0.440364	0.816594	0.924126	1.39292	0.441825	0.635258	-2.91003	0.108617	0.255615	-1.84644	0.308113	0.510943	-1.64674	0.363295	0.596382	-1.52431	0.400019	0.606304	-0.599968	0.752021	0.879277	-0.905231	0.617105	0.793722	-2.92193	0.107184	0.274493	-2.85281	0.115717	0.273348	0.880822	0.626626	0.785788	-2.33963	0.218365	0.457476	-1.66773	0.357219	0.581143
55129	ANO10	-0.105183	0.869852	0.954671	-0.531295	0.408118	0.610072	-1.25565	0.0628564	0.181042	-0.666669	0.299417	0.49348	-0.515498	0.422183	0.63944	-1.22848	0.0563236	0.150255	-0.289903	0.651606	0.8259	-1.67705	0.00933855	0.036995	-1.24946	0.064159	0.179075	-0.480869	0.453997	0.66442	-0.511571	0.425724	0.666904	-0.593797	0.355274	0.581076	-0.548679	0.392968	0.585772	0.241761	0.719562	0.889148	-0.60694	0.344739	0.56884
54840	APTX	0.952566	0.153182	0.354443	-0.306341	0.645529	0.805889	0.582213	0.404713	0.6399	-0.203039	0.760445	0.872225	1.10728	0.0970144	0.235602	0.546732	0.411841	0.615801	0.814195	0.221939	0.436596	0.583464	0.381175	0.588795	1.52396	0.0296667	0.101417	1.35914	0.0418636	0.129959	0.790687	0.235545	0.466087	1.19075	0.0744196	0.199063	0.245891	0.711953	0.844203	0.64556	0.355599	0.614444	0.892843	0.180548	0.371357
472	ATM	0.542519	0.116133	0.292766	0.457442	0.185	0.362266	0.326579	0.366575	0.601766	0.668034	0.0532469	0.146979	0.589644	0.0877974	0.219377	0.614272	0.0753858	0.187645	0.631496	0.0675905	0.189966	0.574621	0.0961488	0.228525	0.371674	0.304231	0.517511	0.40531	0.240081	0.446704	0.765893	0.0268187	0.100162	0.656155	0.0576007	0.165147	0.262649	0.446219	0.635283	0.348733	0.335007	0.593616	0.351913	0.3076	0.527635
1822	ATN1	29.205	0.0209414	0.0824813	39.6309	0.00178969	0.00989114	36.6585	0.00580161	0.0280662	40.1055	0.00157804	0.00902738	31.917	0.0116845	0.0465841	39.0128	0.00210466	0.0105895	28.1584	0.0259537	0.092258	38.2007	0.00259619	0.0128416	30.1958	0.0228148	0.083229	28.0459	0.0265498	0.0920987	29.2094	0.0209226	0.0825414	22.8363	0.0705647	0.191399	46.6225	0.00024827	0.0015002	28.1732	0.0335799	0.12421	31.7194	0.0122081	0.0486375
492	ATP2B3	-0.997431	0.681109	0.856362	5.38274	0.0271045	0.0873899	1.02029	0.688562	0.851773	0.796111	0.742897	0.863005	-2.62835	0.279209	0.492268	1.48953	0.539477	0.725004	-3.19875	0.188043	0.392065	2.27904	0.347993	0.556238	0.172674	0.945913	0.979834	-1.393	0.566064	0.756715	-4.06488	0.0946196	0.251942	-4.89166	0.0444692	0.136031	5.56577	0.022337	0.0688255	-5.22503	0.0407095	0.144257	-1.59328	0.511621	0.721717
51761	ATP8A2	2.98636	0.30487	0.553526	5.37872	0.0650677	0.170156	2.0992	0.491475	0.711591	4.72247	0.105094	0.240966	1.04817	0.718568	0.865651	2.53835	0.383041	0.587818	1.83032	0.529244	0.741825	-0.718136	0.804974	0.908428	1.86986	0.539976	0.736177	3.01476	0.300303	0.516821	2.04554	0.481999	0.714229	0.649649	0.823248	0.921906	8.93398	0.00228241	0.0103588	0.797277	0.793809	0.927504	1.52876	0.599202	0.789438
6310	ATXN1	-3.47096	0.00274883	0.0161557	-0.73863	0.521333	0.709164	-4.54846	0.000193153	0.00160465	-0.307833	0.789213	0.891057	-4.67174	6.09188e-05	0.00053855	-3.6139	0.00183256	0.00945324	-2.84391	0.0139381	0.0570472	-1.81841	0.114944	0.260664	-3.80949	0.00173817	0.0103375	-4.49483	0.000113035	0.000972905	-3.19465	0.00579964	0.0293724	-4.09084	0.00043101	0.00312522	-1.15556	0.315939	0.505849	-3.9429	0.0011966	0.00858636	-4.20023	0.000303031	0.00222722
25814	ATXN10	-5.44505	0.389547	0.640905	-10.7096	0.0910845	0.218953	-12.0833	0.0691989	0.194874	-12.6175	0.0466897	0.133099	-7.44554	0.239594	0.444135	-14.8659	0.0192369	0.0655378	-4.62254	0.465039	0.688483	0.644403	0.918848	0.969129	-12.723	0.0557722	0.162599	-5.26193	0.405673	0.622892	-7.33223	0.246807	0.479869	-6.86334	0.278271	0.498296	-0.781961	0.901606	0.955895	-6.40929	0.334275	0.592759	-6.17403	0.329322	0.552049
6311	ATXN2	-0.636397	0.243911	0.479954	-0.674311	0.217004	0.405866	-0.978924	0.0878107	0.231811	-0.242262	0.657063	0.803778	-0.941394	0.085128	0.21419	-0.485136	0.374179	0.579043	-0.98961	0.0703821	0.195896	-1.30749	0.0170151	0.0601561	-1.16139	0.043024	0.133905	-1.05439	0.053948	0.157037	-1.00595	0.065889	0.195283	-1.28077	0.0193863	0.0717247	-0.579554	0.288524	0.474611	-1.45376	0.0114528	0.0538387	-1.26186	0.0212355	0.0756449
4287	ATXN3	-0.148436	0.582049	0.793807	0.360537	0.181748	0.358132	-0.501243	0.0769953	0.210604	0.344382	0.202061	0.378757	-0.433652	0.108437	0.255317	-0.113476	0.673899	0.825445	-0.22739	0.399287	0.629562	0.177506	0.51046	0.707253	-0.0488838	0.862763	0.939865	-0.132982	0.621934	0.797096	-0.139327	0.605412	0.805594	0.00890483	0.973654	0.990537	0.337535	0.211155	0.381212	-0.333134	0.239268	0.484942	-0.171978	0.52371	0.73183
6314	ATXN7	0.482939	0.12327	0.305179	0.411657	0.188731	0.367282	0.297508	0.364785	0.600048	0.596424	0.0572228	0.155045	0.2775	0.375284	0.595932	0.54344	0.0830143	0.201507	0.510418	0.103408	0.259071	0.634395	0.0431803	0.1255	0.172218	0.599699	0.780631	0.246868	0.430203	0.644133	0.463085	0.139397	0.328966	0.393869	0.208507	0.412207	0.137267	0.660831	0.811196	0.257876	0.432057	0.685945	0.291577	0.351575	0.575664
56652	ATXN80S	1.18052	0.282607	0.528297	1.06171	0.333794	0.537618	1.2779	0.267462	0.495188	1.16457	0.289152	0.483113	1.17859	0.283393	0.496765	1.05198	0.338237	0.542741	1.15064	0.29495	0.525096	1.2516	0.25468	0.453037	0.978229	0.395772	0.611343	1.24243	0.258172	0.46884	1.19886	0.275211	0.51495	1.13212	0.302775	0.526172	1.05915	0.334962	0.525015	1.22968	0.285903	0.541833	1.17416	0.285207	0.502804
146227	BEAN1	-0.829355	0.306094	0.55462	-0.00996183	0.990184	0.996749	-0.909215	0.28475	0.514549	-0.920742	0.255947	0.444016	-0.534235	0.509535	0.715513	-0.706285	0.383337	0.588063	-1.00181	0.216524	0.430013	-0.848186	0.29526	0.500843	-0.582855	0.492662	0.698401	-0.959821	0.236357	0.44268	-1.01201	0.211893	0.433657	-0.951539	0.240418	0.452386	0.896104	0.268866	0.451152	-1.68599	0.0477565	0.162439	-0.820997	0.310987	0.531241
56652	C10orf2	1.15862	0.0278564	0.102681	1.11256	0.0346468	0.104906	1.34308	0.0151451	0.060911	1.26803	0.0161599	0.0593604	1.22354	0.0202551	0.0721676	1.60515	0.00238941	0.0117947	1.19642	0.0231761	0.0847291	0.74911	0.15418	0.32077	1.64235	0.0030392	0.0164117	1.10612	0.0357016	0.115237	1.04249	0.0476815	0.154587	0.948474	0.0714641	0.193168	0.709348	0.177177	0.336343	0.927228	0.0928285	0.258445	1.15537	0.0282943	0.0946454
773	CACNA1A	31.1	1.64419e-18	1.06816e-16	36.5162	4.97436e-24	4.76527e-22	32.0714	5.2657e-18	3.55718e-16	36.9237	1.83652e-24	1.75932e-22	30.6614	4.38243e-18	2.62574e-16	34.5019	6.34028e-22	4.71517e-20	29.9526	2.10064e-17	1.24106e-15	32.6027	5.38985e-20	2.88297e-18	31.0232	4.75187e-17	2.94061e-15	29.4965	5.69307e-17	3.21773e-15	29.6996	3.65622e-17	2.1984e-15	29.7647	3.17056e-17	1.86667e-15	35.1494	1.35427e-22	8.5683e-21	26.5974	3.08369e-13	1.40936e-11	30.047	1.70699e-17	1.01202e-15
440193	CCDC88C	-0.298521	0.782951	0.914991	-0.81437	0.452514	0.65162	-0.168351	0.88224	0.955802	-0.269615	0.803513	0.900011	-0.352134	0.745224	0.880912	-0.277783	0.797688	0.901947	-0.355043	0.743194	0.883026	-0.264949	0.806845	0.909503	-0.116534	0.91833	0.967911	-0.280932	0.795445	0.909354	-0.288119	0.790333	0.913801	-0.32232	0.766135	0.890804	-6.51298	4.66461e-09	6.97433e-08	0.0444254	0.968819	0.993246	-0.302812	0.779911	0.90228
5611	DNAJC3	0.141126	0.901213	0.968261	0.681341	0.549088	0.733031	0.399704	0.73749	0.881768	-0.106106	0.925644	0.966409	-0.367931	0.746244	0.881331	-0.310583	0.784727	0.894529	0.835878	0.462388	0.68663	0.133037	0.906849	0.96338	0.25487	0.830753	0.923646	0.0356358	0.974995	0.992581	0.489561	0.6668	0.844986	-0.0444745	0.968796	0.988025	-0.85754	0.450879	0.639437	0.970382	0.415989	0.67221	-0.137295	0.903881	0.960478
1786	DNMT1	10.0507	1.03283e-07	2.02929e-06	10.639	1.92577e-08	3.92468e-07	10.2684	2.11976e-07	3.80346e-06	11.1133	4.7135e-09	1.09934e-07	10.0806	9.5005e-08	1.64546e-06	11.0048	6.5307e-09	1.34061e-07	9.6614	3.01243e-07	5.06232e-06	10.5925	2.20507e-08	3.61248e-07	9.70879	8.8394e-07	1.39554e-05	9.07972	1.40055e-06	1.97076e-05	9.65374	3.07549e-07	5.29959e-06	9.00135	1.71273e-06	2.32143e-05	10.4275	3.5526e-08	4.66598e-07	8.87755	6.54702e-06	9.12171e-05	9.19163	1.04824e-06	1.51267e-05
1938	EEF2	184.839	0.150487	0.349769	275.579	0.0323815	0.0998474	270.874	0.044847	0.140869	268.273	0.0372229	0.112245	244.78	0.057185	0.16019	220.412	0.0866344	0.207805	193.64	0.132055	0.30893	305.232	0.0178796	0.0624964	262.683	0.0516825	0.154319	215.237	0.0942568	0.234584	207.477	0.106687	0.273631	179.135	0.163448	0.349443	288.043	0.0253682	0.0760913	211.375	0.117055	0.304062	248.288	0.0537309	0.154079
6785	ELOVL4	4.09642	0.33323	0.584549	6.14228	0.14716	0.308064	3.04039	0.493348	0.713644	4.05733	0.337858	0.535643	1.27616	0.76293	0.891277	3.24911	0.442679	0.644353	4.8546	0.25163	0.474071	4.32222	0.30731	0.5139	4.71899	0.287936	0.499725	5.3202	0.209078	0.407158	2.5996	0.539008	0.758476	4.11274	0.331311	0.556007	10.6111	0.0125362	0.0430379	-0.313954	0.943591	0.986785	4.64669	0.27247	0.487497
60481	ELOVL5	1.99896	0.667714	0.848466	-5.91096	0.204771	0.389641	-0.165128	0.973024	0.993053	-2.20433	0.635944	0.789447	1.14161	0.80631	0.914961	1.81477	0.696728	0.839758	3.75509	0.420157	0.64788	-1.66354	0.72089	0.859687	0.709067	0.884547	0.95164	1.50319	0.746818	0.879561	3.66024	0.431981	0.672603	2.50828	0.590146	0.778071	-10.2686	0.0279724	0.0821465	3.77243	0.439989	0.692449	1.68152	0.718003	0.866571
2259	FGF14	5.15592	0.00870797	0.041522	7.02189	0.000374503	0.00263052	3.20232	0.119083	0.286855	7.60205	0.000120431	0.00101392	3.65379	0.0623589	0.171063	4.55701	0.0202783	0.0683711	6.53982	0.000909023	0.00614324	8.29298	2.83681e-05	0.000251556	5.91728	0.00413437	0.0212754	4.20007	0.0323042	0.106857	5.88669	0.00278475	0.0160812	3.91602	0.0458538	0.139361	7.29342	0.000222231	0.00136034	4.46991	0.029862	0.113759	4.78331	0.0148735	0.057174
2332	FMR1	-0.283132	0.8828	0.960399	0.983097	0.608801	0.778317	-2.57164	0.202249	0.412797	1.4118	0.462453	0.653426	-3.86049	0.0450549	0.133418	-2.85639	0.137581	0.290549	0.513937	0.789018	0.908501	-0.0929852	0.961385	0.98726	-1.51706	0.451548	0.662682	-1.5314	0.425449	0.639814	-0.712698	0.710597	0.870535	-0.785002	0.682767	0.84281	2.08192	0.278769	0.462913	-2.01114	0.318423	0.576281	-1.54088	0.422591	0.644723
2395	FXN	0.491754	0.0100049	0.0463251	0.0490523	0.796273	0.898908	0.363564	0.068744	0.194057	-0.180013	0.343705	0.541825	0.286	0.132879	0.2946	0.214094	0.26024	0.457219	0.342234	0.0723279	0.199999	0.164747	0.386126	0.593362	0.495658	0.0132783	0.0540829	0.566952	0.00302895	0.0158858	0.3728	0.0503854	0.161104	0.454314	0.0172534	0.0654326	0.0904803	0.633958	0.790804	0.310004	0.120425	0.310133	0.341269	0.073132	0.194483
57704	GBA2	11.8183	0.000587061	0.00446377	15.7937	5.03957e-06	6.12113e-05	13.1723	0.000263264	0.00208205	16.7107	1.43989e-06	2.10473e-05	11.3421	0.000962429	0.0058428	13.3007	0.000113462	0.000866995	9.1037	0.00787661	0.0363516	-4.0942	0.230117	0.422188	12.562	0.000495842	0.00359448	11.4198	0.000888862	0.00568523	8.24369	0.0160168	0.0666131	9.31756	0.00654658	0.0300416	16.9644	1.00806e-06	1.04606e-05	9.03865	0.0118391	0.0553149	11.35	0.000954688	0.00589715
9570	GOSR2	-0.0583842	0.954384	0.987342	-0.894406	0.381137	0.585271	-0.926959	0.386792	0.622184	-0.495681	0.627278	0.783446	-0.11718	0.908598	0.964635	-0.562704	0.581504	0.758492	0.0149375	0.988323	0.997144	0.121444	0.905288	0.962507	0.0207746	0.984517	0.995647	0.15982	0.875575	0.951255	0.0704827	0.944945	0.985454	-0.0357978	0.972021	0.98947	0.905607	0.375209	0.567939	0.777886	0.467601	0.715321	0.455431	0.655492	0.827034
2895	GRID2	17.6291	2.28323e-31	3.61817e-29	16.9292	1.93672e-29	2.54567e-27	17.1856	5.81979e-28	8.02279e-26	17.229	2.91326e-30	3.92042e-28	17.4189	8.72379e-31	1.24303e-28	17.062	8.38183e-30	1.06061e-27	17.4771	6.01972e-31	9.19553e-29	17.4879	5.62104e-31	6.26004e-29	16.856	4.08318e-27	5.16674e-25	17.247	2.59942e-30	3.5545e-28	17.5571	3.61564e-31	5.83874e-29	17.4014	9.74564e-31	1.53006e-28	16.1376	2.71544e-27	2.2907e-25	17.7555	1.93742e-29	3.31828e-27	17.4308	8.08596e-31	1.15215e-28
2911	GRM1	19.4548	2.89912e-24	2.90873e-22	18.7387	7.6968e-23	6.79724e-21	18.511	1.00269e-20	8.21333e-19	18.3991	3.56981e-22	2.92414e-20	18.1863	9.26558e-22	7.34146e-20	16.8962	2.66016e-19	1.68305e-17	19.6956	9.50608e-25	9.48148e-23	9.95476	3.83059e-08	6.00846e-07	17.9727	9.43878e-20	7.3753e-18	18.4838	2.43757e-22	2.09804e-20	19.5135	2.21019e-24	2.19157e-22	17.9316	2.88256e-21	2.37265e-19	21.2363	6.59e-28	5.88106e-26	19.7716	4.60943e-23	4.79494e-21	19.3299	5.15738e-24	4.83141e-22
3708	ITPR1	42.406	3.35029e-11	1.11606e-09	58.8985	3.30783e-19	2.14075e-17	42.8601	1.51668e-10	4.83398e-09	59.1691	2.37201e-19	1.56497e-17	38.6711	1.21407e-09	2.86588e-08	48.9075	3.73418e-14	1.47592e-12	43.2615	1.4235e-11	4.68676e-10	58.8483	3.51794e-19	1.7648e-17	46.9476	3.07878e-12	1.18645e-10	42.165	4.25445e-11	1.33838e-09	43.3939	1.24547e-11	4.2577e-10	39.8048	4.18937e-10	1.15316e-08	55.133	3.09193e-17	1.19152e-15	39.7758	2.41533e-09	6.58429e-08	40.9556	1.39009e-10	4.06386e-09
3748	KCNC3	6.7755	0.023375	0.0897118	20.0028	7.53219e-11	2.22115e-09	13.691	1.52996e-05	0.000177441	17.2938	1.4158e-08	3.03877e-07	8.79732	0.00332245	0.0166181	16.747	3.79732e-08	6.71402e-07	1.38479	0.641876	0.82036	17.1147	1.96112e-08	3.24734e-07	16.5182	2.15465e-07	3.85382e-06	13.3843	9.39148e-06	0.000109595	1.48128	0.618857	0.814258	6.03126	0.0434047	0.133546	20.4666	2.90666e-11	5.71756e-10	3.39385	0.277481	0.532056	10.6453	0.000396142	0.00279643
3752	KCND3	16.0297	3.42592e-11	1.13457e-09	19.0636	7.11403e-15	3.27787e-13	16.6915	4.62875e-11	1.56034e-09	18.2957	6.68005e-14	2.78982e-12	13.5201	1.69409e-08	3.25681e-07	14.7163	9.71198e-10	2.26515e-08	18.6033	2.74338e-14	1.25045e-12	13.3141	2.72093e-08	4.37724e-07	17.5753	4.91681e-12	1.84446e-10	16.2304	2.01763e-11	6.62827e-10	16.8352	3.98049e-12	1.46406e-10	13.2645	3.04701e-08	5.95907e-07	22.2362	3.76065e-19	1.73276e-17	13.1976	1.39456e-07	2.8063e-06	16.4591	1.09767e-11	3.64942e-10
3766	KCNJ10	-17.971	0.0752623	0.214407	-36.3397	0.000354821	0.00251625	-14.0446	0.184544	0.38803	-24.7251	0.014592	0.0546883	-15.6767	0.120511	0.274649	-19.3804	0.0551556	0.14785	-14.7244	0.144669	0.328687	-28.4709	0.00497956	0.022028	-17.4571	0.0993263	0.245114	-17.5198	0.0828462	0.213974	-12.9959	0.197803	0.414579	-15.3121	0.129356	0.29584	-53.5038	1.96446e-07	2.28354e-06	-6.84224	0.517583	0.75667	-17.1207	0.0900641	0.227454
9711	KIAA0226	-1.22353	0.439192	0.684903	-1.4361	0.363983	0.567356	-1.62229	0.328232	0.562221	-1.04725	0.507852	0.691612	-1.76806	0.263869	0.47535	-1.21225	0.443417	0.644874	-1.56662	0.322078	0.555221	0.101727	0.948696	0.982057	-2.20578	0.184003	0.376853	-2.25258	0.154834	0.33281	-2.01983	0.201942	0.420448	-2.19371	0.165872	0.352527	-2.08174	0.188492	0.351449	-2.26981	0.17163	0.391048	-1.8157	0.25124	0.463752
10749	KIF1C	-10.4908	0.175491	0.388045	-18.0937	0.0197856	0.0682297	-4.51094	0.578173	0.777254	-12.6839	0.101639	0.236082	-4.01483	0.603711	0.787449	-11.1815	0.148823	0.307999	-9.71486	0.209549	0.421084	-38.4158	1.05807e-06	1.29069e-05	0.244303	0.97597	0.992272	-9.57251	0.216286	0.416934	-5.09861	0.509825	0.735815	-8.97417	0.24632	0.459975	-29.3564	0.000172184	0.00108172	-6.05729	0.455345	0.706066	-8.16807	0.291253	0.509806
92935	MARS2	0.69091	0.0711442	0.205857	0.778147	0.0422449	0.122236	0.876778	0.029182	0.101939	0.744116	0.0520431	0.144473	0.62539	0.102231	0.245057	0.848719	0.0268267	0.0852462	0.659961	0.0846927	0.224629	0.666142	0.0818312	0.203033	0.752769	0.0608933	0.172949	0.706067	0.0651909	0.179619	0.603643	0.114675	0.287766	0.523635	0.170981	0.360323	0.467224	0.22174	0.39494	0.517282	0.197151	0.429789	0.52288	0.171598	0.358857
4361	MRE11A	0.00838217	0.975772	0.993575	-0.183549	0.506164	0.696972	-0.00584823	0.983881	0.996293	-0.3326	0.228667	0.41147	-0.0177318	0.948774	0.981658	0.0607582	0.825767	0.919659	0.200782	0.467106	0.689876	-0.0493862	0.85799	0.938162	-0.068982	0.811651	0.914746	-0.042605	0.877322	0.951721	0.192267	0.486191	0.717856	0.106638	0.699249	0.853291	-0.3374	0.222036	0.395321	0.220654	0.44609	0.697519	-0.0243592	0.929671	0.972036
4547	MTPAP	-	-	-	-	-	-	-	-	-	-	-	-	-	-	-	-	-	-	-	-	-	-	-	-	-	-	-	-	-	-	-	-	-	-	-	-	-	-	-	-	-	-	-	-	-
10528	NOP56	3.99992	0.0265686	0.0988798	4.02969	0.025471	0.083039	3.07795	0.10312	0.259231	4.35098	0.0159153	0.058678	4.13402	0.0219295	0.0769213	4.62163	0.0104848	0.040231	3.75092	0.0374665	0.122807	5.6474	0.00180791	0.00948188	4.31975	0.0224203	0.0821788	3.60267	0.0456186	0.138671	2.94091	0.102397	0.26597	3.57985	0.0469979	0.141973	4.72148	0.00894464	0.0327429	3.06834	0.104196	0.280481	3.60195	0.0456616	0.136358
5111	PCNA	14.3027	0.00518372	0.0272966	14.4583	0.0047215	0.0217528	14.4176	0.00719061	0.0334405	14.1143	0.00579835	0.0260617	15.7239	0.00214427	0.0115423	15.7343	0.00212993	0.0106881	16.0719	0.00171007	0.0104339	16.3287	0.00144343	0.00781861	16.286	0.00243116	0.0137181	16.8551	0.00101289	0.00635549	14.5391	0.00449655	0.0238858	15.7963	0.0020464	0.011601	10.9365	0.0321466	0.0916558	13.4046	0.0123904	0.057512	15.3652	0.00269628	0.0141367
5173	PDYN	-1.79587	0.920394	0.976056	-26.5942	0.13953	0.29737	-2.14295	0.909474	0.96744	-37.4662	0.0376828	0.113349	-1.91124	0.915299	0.968233	-6.73286	0.707932	0.846702	-0.971317	0.956893	0.987064	0.0608435	0.997298	0.99938	-4.92751	0.793757	0.904256	-1.68948	0.925096	0.972409	-1.40494	0.937683	0.982048	-3.21052	0.858207	0.938032	-72.2584	7.06057e-05	0.000493077	-3.02566	0.872459	0.960031	-1.20232	0.946656	0.980304
23533	PIK3R5	-	-	-	-	-	-	-	-	-	-	-	-	-	-	-	-	-	-	-	-	-	-	-	-	-	-	-	-	-	-	-	-	-	-	-	-	-	-	-	-	-	-	-	-	-
11284	PNKP	0.132404	0.910986	0.97202	0.847932	0.474183	0.67089	0.929013	0.454696	0.683677	0.441906	0.709081	0.840076	1.48527	0.210333	0.407177	1.84014	0.120906	0.264425	-0.098315	0.933841	0.977843	-0.525466	0.657318	0.820788	0.962895	0.438428	0.651646	0.515471	0.66343	0.824353	0.178741	0.880039	0.957517	0.50213	0.671622	0.836309	1.80473	0.128199	0.266227	1.31214	0.2912	0.547597	0.736419	0.534188	0.74057
5428	POLG	1.02081	0.323297	0.572308	1.83844	0.0757402	0.191223	1.18471	0.274496	0.503336	1.64254	0.112409	0.252457	1.04718	0.310974	0.527868	1.68397	0.103664	0.236032	0.296594	0.773986	0.89987	2.55757	0.01369	0.0504192	0.967437	0.372061	0.588935	0.716353	0.488074	0.69288	0.433335	0.674829	0.849283	0.130168	0.899703	0.95771	1.68999	0.10244	0.225106	0.385405	0.722009	0.89042	0.316822	0.759036	0.890428
11128	POLR3A	-0.230253	0.832292	0.939132	1.63478	0.133342	0.287946	-0.665173	0.559785	0.765384	2.08296	0.0560567	0.152568	-1.60107	0.141508	0.308395	-0.457135	0.674204	0.825639	-0.324422	0.765428	0.895075	2.29459	0.0354214	0.10752	-0.559113	0.623982	0.797846	-1.43077	0.188764	0.380219	-0.924117	0.395612	0.639872	-1.63589	0.133079	0.301026	3.37855	0.00203199	0.00938302	-1.35906	0.233832	0.47827	-1.22332	0.260983	0.474861
5521	PPP2R2B	-17.3807	5.87681e-06	7.95369e-05	-18.3067	1.89379e-06	2.54079e-05	-19.5415	1.25798e-06	1.89603e-05	-15.2358	6.73581e-05	0.000621057	-17.8567	3.30295e-06	4.02623e-05	-18.2891	1.93585e-06	2.3717e-05	-17.2782	6.64183e-06	8.31749e-05	-11.8039	0.00192141	0.00996923	-17.3569	1.56009e-05	0.000182308	-16.9028	1.03481e-05	0.0001192	-17.7827	3.61522e-06	5.00814e-05	-17.5629	4.7202e-06	5.85057e-05	-21.3686	3.22715e-08	4.26164e-07	-21.2476	1.49485e-07	2.96106e-06	-17.0755	8.44753e-06	9.79059e-05
144165	PRICKLE1	-7.35539	0.000180366	0.00164779	-3.27844	0.0923445	0.221174	-8.30399	5.70378e-05	0.000562941	-4.79535	0.0140448	0.0530861	-8.64455	1.16302e-05	0.000124104	-6.32402	0.00124421	0.00677486	-7.48163	0.000140113	0.00124777	-9.99054	4.56844e-07	5.99555e-06	-7.09389	0.000562128	0.00399977	-7.29178	0.000204572	0.00162242	-7.64705	0.000100109	0.000952556	-8.53661	1.48325e-05	0.000163312	-0.432268	0.824015	0.913501	-9.0897	1.10608e-05	0.000147095	-8.16426	3.36757e-05	0.000330634
5582	PRKCG	13.8249	0.288803	0.535771	-13.8222	0.288899	0.490249	-6.99123	0.608803	0.799107	-51.1779	0.000101812	0.0008772	0.50927	0.968805	0.989932	-23.6339	0.0702212	0.177633	-3.06778	0.813767	0.921295	-11.6723	0.370359	0.578571	-19.8371	0.147011	0.322724	-8.89679	0.494632	0.698648	7.8666	0.545894	0.762761	-4.46307	0.731828	0.872022	-6.61476	0.611552	0.773891	19.2499	0.159317	0.373636	-4.87916	0.70793	0.861107
26278	SACS	-4.53698	0.0116916	0.0523622	-2.70043	0.132259	0.286156	-4.13692	0.0281985	0.099399	-2.56774	0.152281	0.312864	-5.60378	0.00189273	0.0103794	-4.77869	0.00794761	0.032017	-3.65916	0.0416679	0.13298	-5.55172	0.00208317	0.0106424	-4.08599	0.030183	0.102706	-3.95895	0.0276265	0.0947864	-4.12365	0.0218203	0.0851126	-5.11541	0.00452296	0.0224704	-3.36888	0.0606394	0.150785	-5.4959	0.00364268	0.021506	-4.94235	0.00606577	0.027427
950	SCARB2	-9.96623	0.209195	0.433791	-15.0215	0.058762	0.157828	-15.6225	0.0609029	0.1771	-8.47748	0.285278	0.478643	-12.4047	0.11828	0.270728	-5.77428	0.466525	0.666083	-4.55612	0.56555	0.768448	-7.84463	0.322716	0.530493	-8.82971	0.28862	0.500547	-8.50354	0.283802	0.49872	-5.70319	0.472026	0.706289	-11.119	0.161324	0.346079	-27.9929	0.000466281	0.00262579	-13.2372	0.112014	0.294878	-14.638	0.06548	0.179077
23064	SETX	1.47571	0.167978	0.37685	1.38331	0.196142	0.377372	1.49595	0.182622	0.385142	1.43406	0.18027	0.351218	0.9944	0.352493	0.572223	1.27701	0.232667	0.422434	2.07354	0.0530346	0.15968	1.59522	0.136213	0.29366	1.20645	0.28224	0.493966	1.1996	0.262159	0.473344	1.9248	0.072408	0.208908	0.960106	0.369325	0.594951	0.930025	0.384495	0.5771	1.16825	0.297729	0.555274	0.96116	0.3688	0.592391
64374	SIL1	-1.25216	0.0240419	0.0916697	-1.91322	0.000602093	0.00395701	-0.921784	0.112555	0.275473	-2.35764	2.56616e-05	0.000269423	-1.3309	0.0165219	0.0615299	-1.32031	0.0173945	0.0606501	-1.44811	0.00915328	0.0408107	-3.64226	1.65348e-10	3.69874e-09	-1.35926	0.0195518	0.0738681	-1.35185	0.014909	0.0585443	-1.25668	0.0235412	0.0903849	-1.22874	0.0267911	0.0921627	-3.62101	2.07945e-10	3.6805e-09	-0.72425	0.212157	0.449107	-1.52926	0.0059461	0.0270038
6548	SLC9A1	-0.620854	0.670145	0.850331	1.50915	0.300809	0.502514	0.588385	0.700314	0.858445	0.817603	0.574881	0.745463	-0.601197	0.679997	0.839548	1.02626	0.48148	0.678353	-2.13397	0.143759	0.327437	-6.65007	6.95483e-06	7.10827e-05	0.0226715	0.988166	0.996727	-0.46426	0.75008	0.88182	-1.77151	0.224664	0.451512	-2.49568	0.0874981	0.223605	-0.95818	0.511015	0.692077	-3.1311	0.0411368	0.145225	-1.10216	0.449686	0.669319
6687	SPG7	-0.800342	0.624396	0.821343	0.690952	0.672494	0.825624	1.00559	0.557527	0.763913	1.4797	0.36554	0.562543	-0.378104	0.817045	0.919847	0.909247	0.578056	0.755881	-2.72649	0.0959359	0.245465	1.97382	0.227643	0.419267	-0.171103	0.920485	0.968674	-1.03866	0.5252	0.723772	-3.14575	0.0549089	0.170801	-1.93012	0.238081	0.449644	1.76682	0.280072	0.464622	-1.65688	0.334059	0.592622	-1.52649	0.350597	0.574898
6712	SPTBN2	22.676	0.00709689	0.0349585	33.4688	7.84473e-05	0.000679689	24.8104	0.00499616	0.0250265	29.4574	0.000492652	0.00342493	18.5511	0.0273546	0.0915382	19.4779	0.0205692	0.0690697	16.9901	0.0431844	0.136611	35.3115	3.1659e-05	0.000277708	15.9866	0.0695185	0.189908	15.3534	0.0675259	0.184108	18.1044	0.0312674	0.112016	12.9825	0.121879	0.283615	38.8192	5.05219e-06	4.53974e-05	19.2825	0.0287555	0.110606	18.1263	0.0310651	0.101589
10273	STUB1	15.1844	0.45872	0.700714	37.3377	0.0690239	0.178253	34.237	0.111702	0.274139	23.5129	0.251501	0.438638	45.5001	0.0268877	0.0903682	38.1273	0.0633791	0.16485	19.3481	0.345224	0.579566	27.1406	0.185766	0.364566	46.175	0.0321984	0.107854	37.9937	0.0643068	0.177964	25.2308	0.21858	0.443383	29.3548	0.152475	0.332497	48.4326	0.0185401	0.0594528	39.3901	0.0674161	0.206972	43.5122	0.034251	0.109474
23345	SYNE1	3.0098	0.0166716	0.0691666	4.65356	0.000233378	0.00174632	3.3365	0.0114398	0.0484329	3.92622	0.00184831	0.0102351	2.31092	0.0655929	0.177129	3.98079	0.00159821	0.00838727	2.90822	0.0206828	0.0776567	4.81928	0.000140004	0.001025	2.38108	0.0704555	0.191818	2.04377	0.103263	0.25092	2.767	0.0276516	0.102528	2.94095	0.0193069	0.0714934	2.95687	0.0186668	0.0597873	3.07596	0.0196411	0.0826389	2.03175	0.105298	0.253685
255928	SYT14	0.333953	0.397946	0.647899	0.288362	0.465394	0.662738	-0.0174413	0.966407	0.990414	0.260749	0.509165	0.6925	0.10757	0.785308	0.904086	0.170865	0.665263	0.819835	0.455794	0.24884	0.4704	0.609316	0.123463	0.274299	0.194707	0.638302	0.808748	0.274492	0.487114	0.692103	0.48069	0.223975	0.450393	0.251513	0.524275	0.728272	0.553134	0.161874	0.315886	0.340736	0.410877	0.667783	0.068423	0.862432	0.942705
6908	TBP	0.950874	0.15711	0.360434	1.37477	0.0411197	0.119757	0.479013	0.496281	0.716423	1.64851	0.0144577	0.0543316	1.49731	0.0262105	0.0886192	1.50148	0.0257984	0.0825852	1.51565	0.0244421	0.0883463	1.43081	0.0335852	0.103109	0.963689	0.171522	0.358037	1.30306	0.0528206	0.154899	1.40788	0.0365112	0.126163	1.35689	0.0438089	0.134496	1.58871	0.0183877	0.0590719	0.999903	0.156027	0.368725	1.61364	0.0166475	0.0624364
55775	TDP1	0.472628	0.105939	0.274098	0.349181	0.231896	0.424436	0.292655	0.339225	0.574363	0.677694	0.0206957	0.071557	0.475023	0.104188	0.248364	0.542109	0.0638443	0.16578	0.626682	0.0323088	0.109522	0.875949	0.00285959	0.0139371	0.423403	0.167078	0.351573	0.484196	0.0976952	0.240913	0.388043	0.184107	0.397418	0.441409	0.130967	0.298016	0.278813	0.33961	0.530487	0.461774	0.131948	0.331012	0.39025	0.181632	0.372671
51567	TDP2	1.78718	0.360046	0.611533	1.43069	0.463637	0.66129	0.0437837	0.982932	0.995794	0.836182	0.668326	0.812049	1.04267	0.593199	0.780681	1.10881	0.569984	0.748791	2.14316	0.272513	0.498784	1.21994	0.531984	0.725121	2.16233	0.291126	0.503422	2.81019	0.150464	0.326584	0.326528	0.867113	0.952646	2.11497	0.278861	0.49872	2.54428	0.19285	0.357425	-1.22336	0.550119	0.780964	2.20783	0.258332	0.472115
343641	TGM6	-	-	-	-	-	-	-	-	-	-	-	-	-	-	-	-	-	-	-	-	-	-	-	-	-	-	-	-	-	-	-	-	-	-	-	-	-	-	-	-	-	-	-	-	-
339453	TMEM240	3.43223	0.402046	0.650965	8.79	0.0323616	0.0998404	6.43766	0.134421	0.312224	7.05026	0.0857155	0.208014	6.08979	0.137502	0.302417	7.56474	0.065294	0.168283	4.12445	0.314057	0.546785	6.58489	0.108392	0.249885	6.55263	0.127625	0.29446	4.73838	0.247549	0.456541	4.2736	0.296905	0.539468	4.14807	0.311298	0.535701	5.46783	0.182237	0.343488	3.89532	0.364567	0.622946	6.11412	0.135942	0.303984
1200	TPP1	-8.57483	0.0675587	0.198442	-22.2204	2.98036e-06	3.85763e-05	-12.0006	0.0149124	0.0602464	-17.0918	0.000297701	0.00222371	-8.8233	0.0600215	0.166213	-13.7966	0.00339316	0.0157888	-9.23456	0.0490906	0.150575	-13.7577	0.00348307	0.0163644	-11.9222	0.0155741	0.061432	-11.0347	0.0188475	0.0701136	-9.29761	0.0475732	0.154383	-11.5057	0.0143682	0.0564082	-29.8503	5.68898e-10	9.53186e-09	-7.41191	0.131633	0.330455	-10.9686	0.0195652	0.0709013
7222	TRPC3	5.39666	3.14691e-10	9.37769e-09	5.92847	6.34803e-12	2.11557e-10	5.92438	5.11504e-11	1.71297e-09	5.9479	5.47727e-12	1.81392e-10	5.83508	1.28409e-11	4.06972e-10	5.97421	4.48289e-12	1.41549e-10	5.77645	1.99018e-11	6.4895e-10	2.57521	0.0021361	0.0108768	6.07445	1.7755e-11	6.22013e-10	6.00747	3.47704e-12	1.25976e-10	5.60869	6.8515e-11	2.13163e-09	5.71439	3.15377e-11	1.00897e-09	3.46174	4.04359e-05	0.000299533	3.08808	0.000459383	0.00378488	5.89641	8.09241e-12	2.73882e-10
146057	TTBK2	-0.907886	0.456903	0.699497	2.21523	0.0700502	0.180321	-0.838268	0.512466	0.72873	2.19643	0.0724496	0.184702	-1.74089	0.15416	0.327683	1.06139	0.384511	0.589011	-0.94384	0.43929	0.665868	-0.433756	0.722179	0.860766	-0.0104344	0.993493	0.998214	-0.448353	0.713238	0.857037	-0.308068	0.800628	0.919372	-1.08713	0.3731	0.599096	2.63931	0.0310676	0.0891256	-0.612279	0.632301	0.836966	-1.41847	0.245371	0.456296
54902	TTC19	0.0322708	0.982969	0.994821	0.800186	0.59667	0.769423	-1.92493	0.225237	0.443722	-0.303141	0.841078	0.921512	-0.366865	0.808267	0.915879	-1.47911	0.328221	0.532058	0.48148	0.750133	0.886668	1.11899	0.459369	0.663667	-1.86241	0.24063	0.446627	0.297735	0.843875	0.935273	-0.896742	0.553168	0.767806	-0.403745	0.789428	0.903387	3.44744	0.023104	0.0707133	-2.91411	0.0667509	0.205339	-0.386581	0.798181	0.912115
7345	UCHL1	-247.98	0.00394562	0.0219063	-290.688	0.000748286	0.00473961	-334.442	0.000222534	0.00180886	-334.046	0.000111623	0.000949343	-254.146	0.00314448	0.0158684	-303.31	0.000439683	0.00279223	-317.269	0.000239063	0.00196679	-362.545	2.84664e-05	0.000252182	-297.082	0.00101461	0.00661679	-210.854	0.0140853	0.0558929	-313.398	0.000283706	0.00237322	-245.36	0.00433915	0.0216779	-120.03	0.160981	0.314688	-187.497	0.0371486	0.134305	-230.727	0.00727184	0.0319103
6843	VAMP1	-49.7321	5.57938e-12	2.04328e-10	0.703175	0.919599	0.964875	-22.4506	0.00227597	0.0130508	-3.25996	0.639867	0.792346	-39.4227	3.17381e-08	5.90726e-07	-3.27045	0.638791	0.799582	-68.9187	1.83211e-20	1.38684e-18	-35.425	5.98096e-07	7.70617e-06	-4.60454	0.528677	0.728083	-14.2151	0.0419211	0.130043	-73.2978	1.28778e-22	1.11978e-20	-43.4025	1.34504e-09	3.38879e-08	0.586838	0.932867	0.971088	-69.6861	2.81171e-19	2.17696e-17	-37.6703	1.18496e-07	2.11942e-06
51741	WWOX	4.97956	2.64219e-08	5.76589e-07	2.99776	0.000678138	0.00437872	5.04351	7.41119e-08	1.45276e-06	3.87671	1.24233e-05	0.00014369	4.67651	1.61626e-07	2.63767e-06	4.20803	2.2248e-06	2.68305e-05	4.81771	7.02765e-08	1.361e-06	2.91395	0.000950416	0.0054554	4.43182	2.02471e-06	2.97754e-05	4.58034	2.81853e-07	4.67165e-06	4.97027	2.79655e-08	5.90515e-07	4.73714	1.13298e-07	1.99696e-06	2.07124	0.0183532	0.0589896	5.0008	9.43863e-08	1.97582e-06	4.60275	2.47798e-07	4.07928e-06
